# Supplementary material for: Modeling HIV-HCV coinfection epidemiology in the direct-acting antiviral era: the road to elimination
Source: Springer Nature journal article supplement (doi:10.1186/s12916-017-0979-1), 2017-12-01

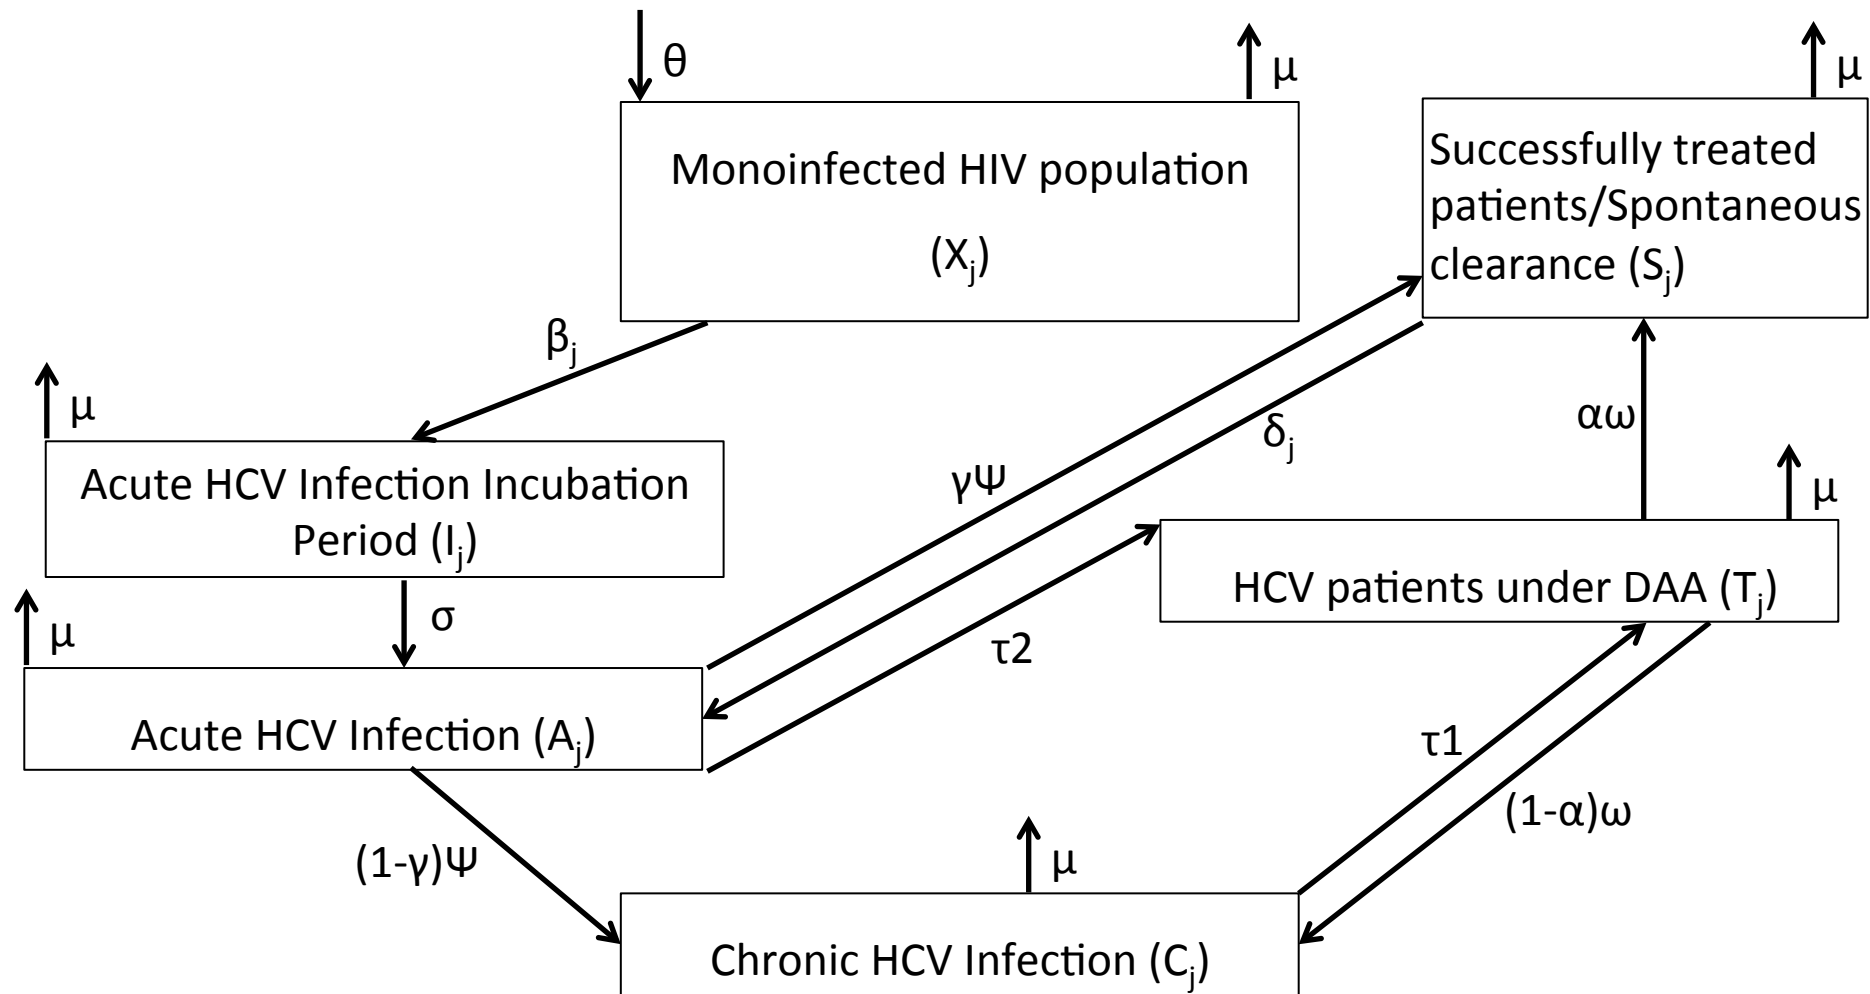

Supplement: MOESM2 [file 15313024]
