# Supplementary material for: Modeling HIV-HCV coinfection epidemiology in the direct-acting antiviral era: the road to elimination
Source: Springer Nature journal article supplement (doi:10.1186/s12916-017-0979-1), 2017-12-01

A. MSM HIV-HCV high-risk (coverage chronic infection 30%)

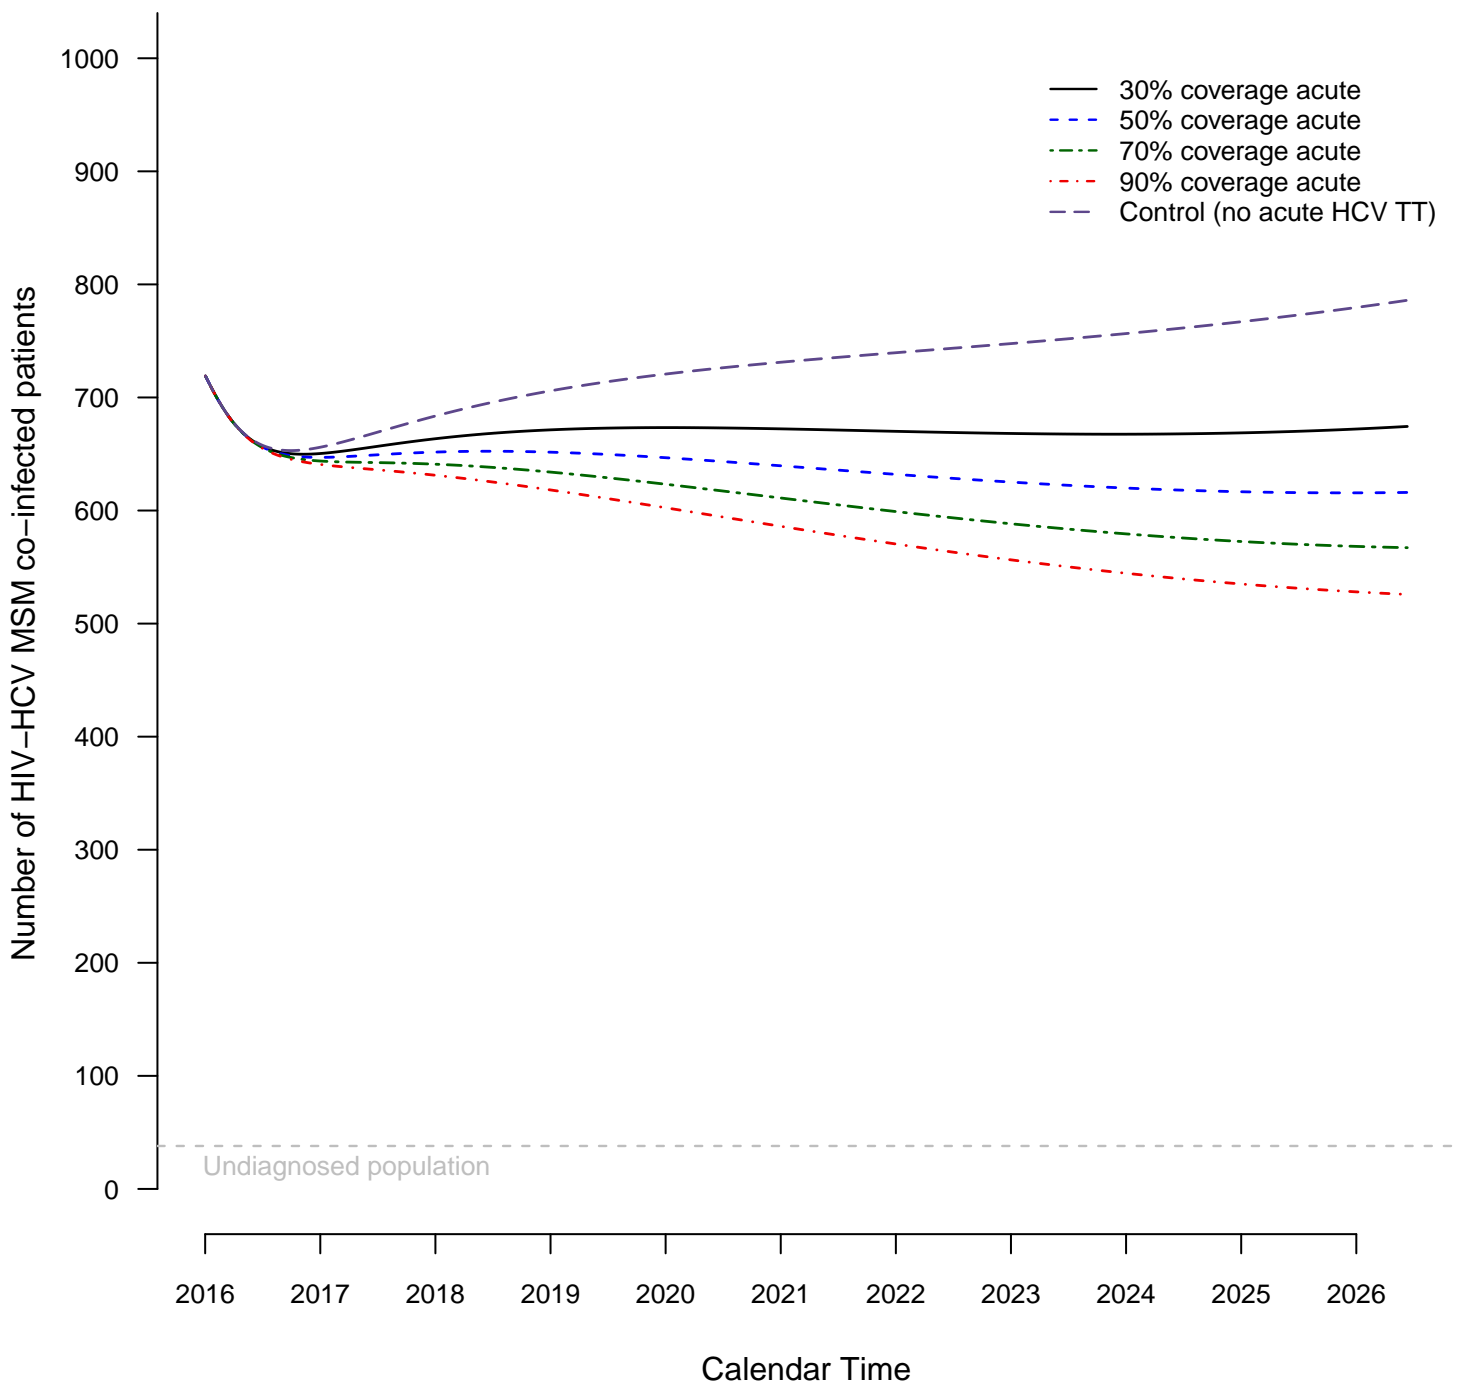

B. MSM HIV-HCV high-risk (coverage chronic infection 50%)

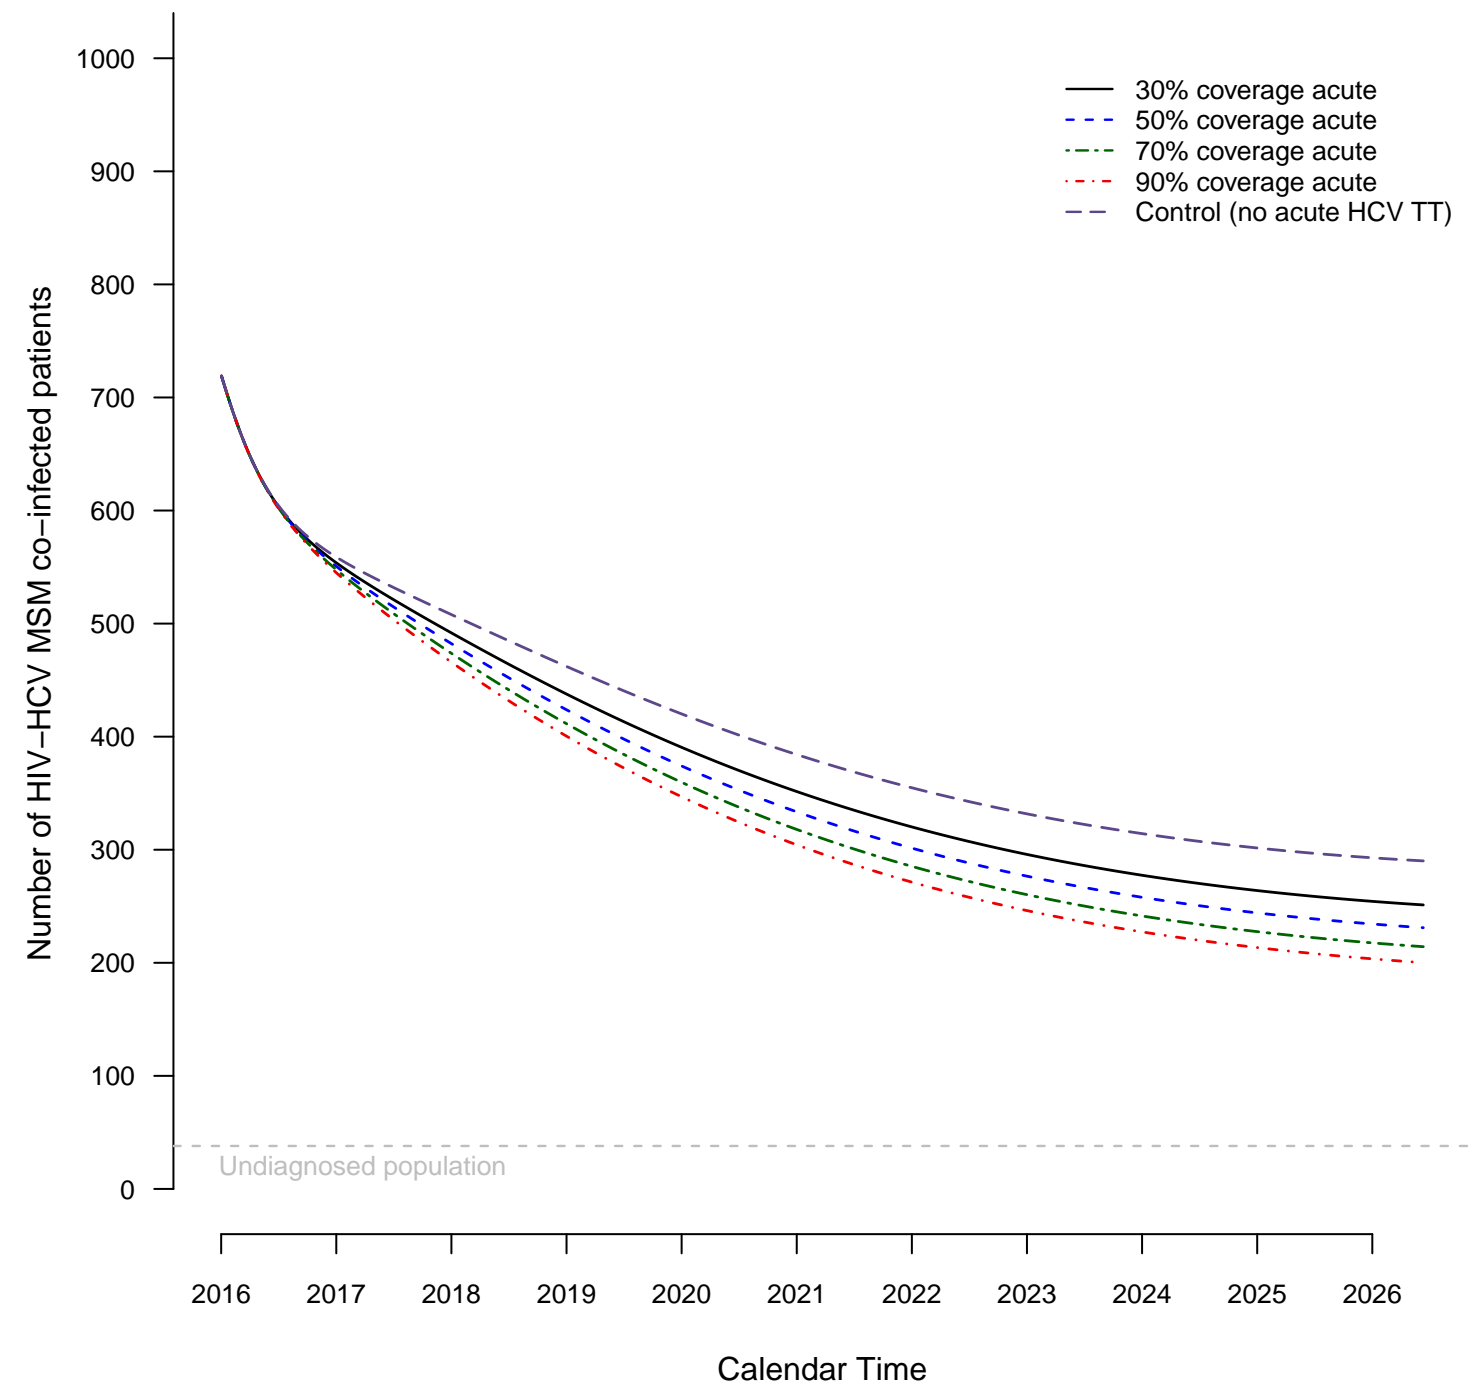

Supplement: MOESM6 [file 15313024]
